# Supplementary material
Source: Springer Nature journal article supplement (https://www.springermedizin.de/resource/supplementary/13063_2011_954_MOESM4_ESM.pdf/9619220)

a) I wash my hands usually having come to work

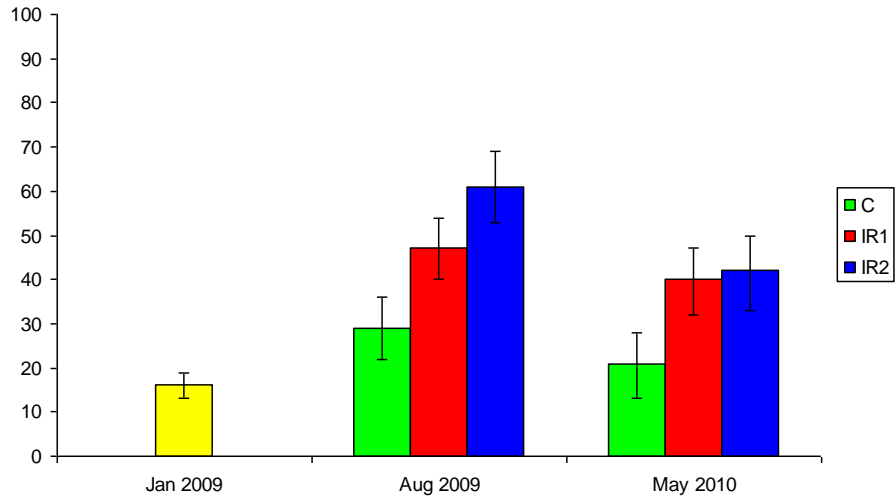

c) When I have a cold I usually shake hands as usual

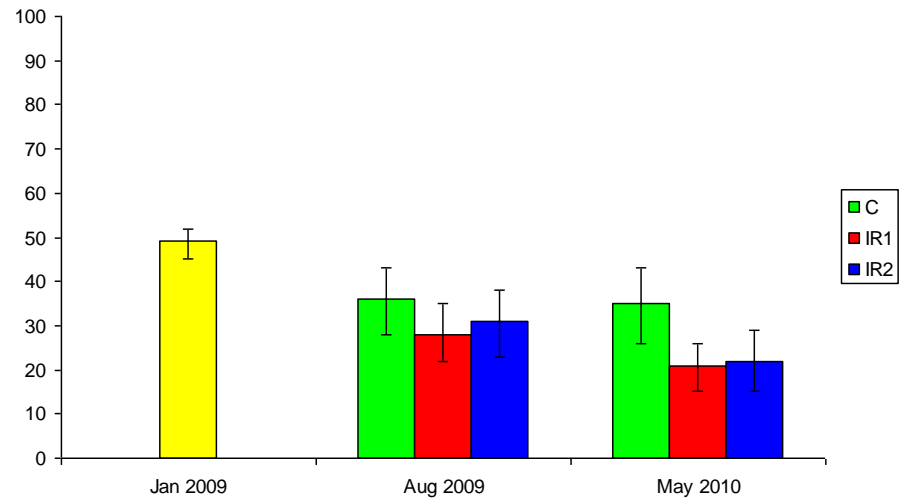

b) I wash my hands before eating at a restaurant

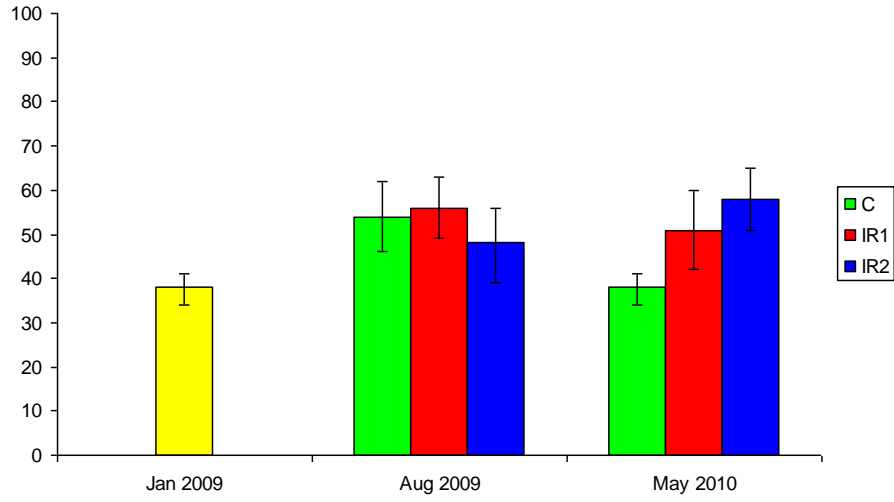

d) When I have vomiting/diarrhea disease, usually I shake hands as usual

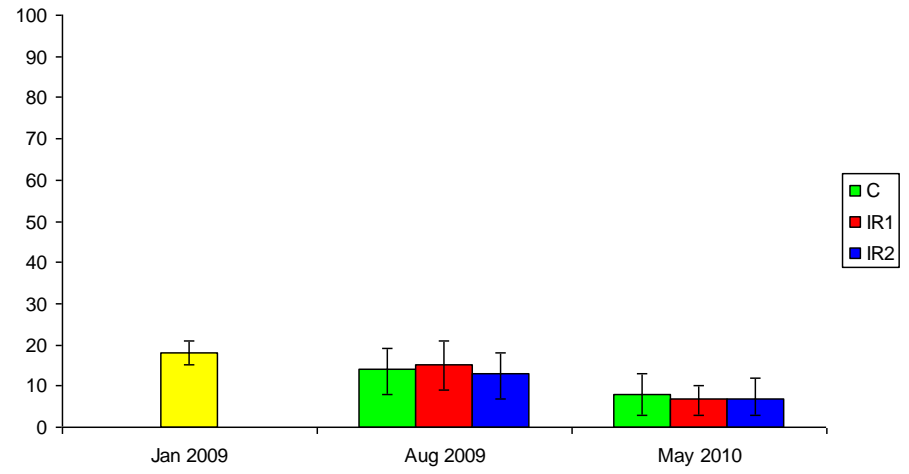

Supplement: MOESM4 [file 9619220]
